# Supplementary material for: Bridging the Reciprocal Gap between Sleep and Fruit and Vegetable Consumption: A Review of the Evidence, Potential Mechanisms, Implications, and Directions for Future Work
Source: PubMed Central journal article supplement (PMC6627504; doi:10.3390/nu11061382), 2019-06-19
Supplement: nutrients-11-01382-s001.pdf [file nutrients-11-01382-s001.pdf]

**Table S1. Search terms used for literature review**

|                                                                                                                                                             |
|-------------------------------------------------------------------------------------------------------------------------------------------------------------|
| 1. SLEEP/                                                                                                                                                   |
| 2. sleep.tw.                                                                                                                                                |
| 3. or/1-2 [sleep]                                                                                                                                           |
| 4. exp Fruit/                                                                                                                                               |
| 5. exp Citrus/                                                                                                                                              |
| 6. exp VEGETABLES/                                                                                                                                          |
| 7. or/4-6 [fruit or vegetables]                                                                                                                             |
| 8. (food adj2 intake*).tw.                                                                                                                                  |
| 9. (dietary pattern or dietary habit*).tw.                                                                                                                  |
| 10. food consumption.tw.                                                                                                                                    |
| 11. Food Habits/                                                                                                                                            |
| 12. Food Preferences/                                                                                                                                       |
| 13. Nutritional status/                                                                                                                                     |
| 14. Nutritional assessment/                                                                                                                                 |
| 15. Diet/                                                                                                                                                   |
| 16. Health behavior/                                                                                                                                        |
| 17. diet*.tw.                                                                                                                                               |
| 18. Eating/                                                                                                                                                 |
| 19. eating.tw.                                                                                                                                              |
| 20. or/8-19 [diet terms]                                                                                                                                    |
| 21. 7 or 20 [fruit or veg or diet]                                                                                                                          |
| 22. 3 and 21 [sleep and fruit or veg or diet]                                                                                                               |
| 23. (exp adolescent/ or exp child/ or exp newborn/) not ((exp adult/ or exp aged/ or exp middle aged/) and (exp adolescent/ or exp child/ or exp newborn/)) |
| 24. 22 not 23 [adult only results]                                                                                                                          |
| 25. exp animals/ not exp humans/                                                                                                                            |
| 26. 24 not 25 [human only studies]                                                                                                                          |
| 27. exp BIOMARKERS/                                                                                                                                         |
| 28. biomarkers.tw.                                                                                                                                          |
| 29. or/27-28 [biomarkers]                                                                                                                                   |
| 30. 3 and 29                                                                                                                                                |
| 31. exp POLYPHENOLS/                                                                                                                                        |
| 32. polyphenols.tw.                                                                                                                                         |
| 33. or/31-32 [polyphenols]                                                                                                                                  |
| 34. 3 and 33                                                                                                                                                |
